# Supplementary material for: Lernen und üben wir das Richtige?
Source: Springer Nature journal article supplement (doi:10.1007/s10049-020-00824-2), 2021-01-12
Supplement: MOESM1 [file 19031894]

## Zusatzmaterial zum Beitrag

Drews P., Berger M., Sautter J. und Rohde A.: Lernen und Üben wir das Richtige? Kritische Erfolgsfaktoren der Bewältigung des Massenfalls von Verletzten: Ergebnisse einer FMEA und einer Analyse von MANV-bezogenen Curricula. (2020) publiziert in *Notfall und Rettungsmedizin*.

Beitrag und Zusatzmaterial stehen Ihnen auf [www.springermedizin.de](http://www.springermedizin.de) zur Verfügung. Bitte geben Sie dort den Beitragstitel in die Suche ein.

### Experte 1

| Lageerkennung                            |                                                                     |                                  |           |
|------------------------------------------|---------------------------------------------------------------------|----------------------------------|-----------|
| 1. Fehler                                | 2. Fehlerauswirkung                                                 | 3. Fehlerursache                 | 4. Risiko |
| Dauert zu lange                          | Zeitverzug in der weiteren Alarmierung sowie Informationsweitergabe | Mangelnde Übung                  | 5         |
| unstrukturiert                           | Fehlerhafte Informationen                                           | Fehlende Absprache               | 4         |
| MANV wird nicht realisiert               | verschlechternde Auswirkung auf Patientenzustand                    | mangelhafte Ausbildung           | 9         |
| Lagebeurteilung                          |                                                                     |                                  |           |
| 1. Fehler                                | 2. Fehlerauswirkung                                                 | 3. Fehlerursache                 | 4. Risiko |
| unpräzise                                | Leitstelle löst fehlerhafte Alarmierungsfolge aus                   | Nichteinhaltung der Funkbegriffe | 7         |
| Quantitative Rückmeldung                 | Limitierung der notwendigen Einsatzmittel                           | Mangelhafte Ausbildung           | 7         |
| Nachforderung                            |                                                                     |                                  |           |
| 1. Fehler                                | 2. Fehlerauswirkung                                                 | 3. Fehlerursache                 | 4. Risiko |
| Quantitativ zu geringe Primäralarmierung | Limitierung der Einsatzkräfte, Verzögerung des Einsatzverlaufes     | unvollständige Sichtung          | 6         |
| Fehlende Angaben zur Anfahrt             | –                                                                   | –                                | –         |
| Raumordnung                              |                                                                     |                                  |           |
| 1. Fehler                                | 2. Fehlerauswirkung                                                 | 3. Fehlerursache                 | 4. Risiko |
| Zu späte Einrichtung                     | Verkehrschaos an der Einsatzstelle                                  | Mangelnde Übung und Ausbildung   | 5         |
| Keine Bildung von Einsatzabschnitten     | Überforderung der Führungskräfte                                    | Fehlende Übung                   | 4         |
| Patientenablage                          |                                                                     |                                  |           |
| 1. Fehler                                | 2. Fehlerauswirkung                                                 | 3. Fehlerursache                 | 4. Risiko |

|                                               |                                                        |                      |   |
|-----------------------------------------------|--------------------------------------------------------|----------------------|---|
| Einrichtung obwohl geografisch nicht sinnvoll | Zeitverzug, Patientenschädigung                        | Fehlende Führung     | 6 |
| Fehlende Führung                              | Patienten möglicherweise ohne medizinischer Versorgung | Mangelnde Ausbildung | 8 |
| Einrichtung trotz zu geringer Ressourcen      | Zeitverzug                                             | Mangelnde Erfahrung  | 6 |

## Experte 2

| Lageerkundung              |                                                                     |                                                                |           |
|----------------------------|---------------------------------------------------------------------|----------------------------------------------------------------|-----------|
| 1. Fehler                  | 2. Fehlerauswirkung                                                 | 3. Fehlerursache                                               | 4. Risiko |
| Keine umfassende Erkundung | Nicht ausreichende Nachalarmierung, zeitliche Verzögerung           | Fehlende Ausbildung, fehlende Übung,                           | 8         |
| Lagebeurteilung            |                                                                     |                                                                |           |
| 1. Fehler                  | 2. Fehlerauswirkung                                                 | 3. Fehlerursache                                               | 4. Risiko |
| Unpräzise Lagebeurteilung  | Zu geringe Nachforderung, zeitliche Verzögerung                     | Vermeidungstaktik                                              | 8         |
| Nachforderung              |                                                                     |                                                                |           |
| 1. Fehler                  | 2. Fehlerauswirkung                                                 | 3. Fehlerursache                                               | 4. Risiko |
| Zu geringe Nachforderung   | Zeitliche Verzögerung                                               | Vermeidungstaktik, fehlende Erfahrung                          | –         |
| Zögernde Nachforderung     | Zeitliche Verzögerung                                               | Vermeidungstaktik, fehlende Erfahrung                          | –         |
| Vorsichtung                |                                                                     |                                                                |           |
| 1. Fehler                  | 2. Fehlerauswirkung                                                 | 3. Fehlerursache                                               | 4. Risiko |
| Abweichen vom Algorithmus  | Zeitverzug, falsche Entscheidungen                                  | Mangelndes Verständnis, Abweichen von Regeln, mangelnde Übung  | 8         |
| Individualmedizin          | Zeitverzögertes Finden von Patienten mit SK1 und Transportpriorität | Psychologische Aspekte, mangelnde Übung                        | 10        |
| Transportorganisation      |                                                                     |                                                                |           |
| 1. Fehler                  | 2. Fehlerauswirkung                                                 | 3. Fehlerursache                                               | 4. Risiko |
| Fehlende Einrichtung       | Fehlender Überblick, falsche Klinikzuweisung, Patientenschädigung   | keinen Verantwortlichen benannt, Überlastung der Führungsebene | 10        |

## Experte 3

| Fehler                                       | 2. Fehlerauswirkung                                                       | 3. Fehlerursache                                    | 4. Risiko |
|----------------------------------------------|---------------------------------------------------------------------------|-----------------------------------------------------|-----------|
| <b>Lageerkundung</b>                         |                                                                           |                                                     |           |
| Keine umfassende Erkundung                   | Fehlerhafte Nachalarmierung, zeitliche Verzögerung Versorgungslücke       | Unstrukturiertes Vorgehen, fehlende Konditionierung | 6         |
| <b>Lagebeurteilung</b>                       |                                                                           |                                                     |           |
| Missdeutung der Lage                         | Eigengefährdung                                                           | Unstrukturiertes Vorgehen, fehlende Konditionierung | 8         |
| <b>Raumordnung</b>                           |                                                                           |                                                     |           |
| 1. Fehler                                    | 2. Fehlerauswirkung                                                       | 3. Fehlerursache                                    | 4. Risiko |
| Kein Aufbau einer Raumordnung                | längere Transportwege, Ressourcenbindung, Verlängerung der Prozessabläufe | Nicht Erkennen der MANV-Lage                        | 7         |
| <b>Führungsstruktur</b>                      |                                                                           |                                                     |           |
| 1. Fehler                                    | 2. Fehlerauswirkung                                                       | 3. Fehlerursache                                    | 4. Risiko |
| Parallelstrukturen                           | Führungschaos, Ressourcenverschwendung                                    | Rechtliche Unklarheiten, fehlende Abstimmung        | 8         |
| <b>Transportorganisation</b>                 |                                                                           |                                                     |           |
| 1. Fehler                                    | 2. Fehlerauswirkung                                                       | 3. Fehlerursache                                    | 4. Risiko |
| Schlechte logistische Lagerung der Patienten | Zeitlicher Verzug                                                         | Schlechte Raumordnung                               | 4         |
| <b>Sichtung</b>                              |                                                                           |                                                     |           |
| 1. Fehler                                    | 2. Fehlerauswirkung                                                       | 3. Fehlerursache                                    | 4. Risiko |
| Abweichen vom Sichtungsalgorithmus           | Zeitliche Verzögerung                                                     | Zu wenig Erfahrung                                  | 7         |

## Experte 4

| <b>Lageerkundung</b>                         |                                                       |                                                             |           |
|----------------------------------------------|-------------------------------------------------------|-------------------------------------------------------------|-----------|
| 1. Fehler                                    | 2. Fehlerauswirkung                                   | 3. Fehlerursache                                            | 4. Risiko |
| Keine Lageerkundung durchgeführt             | Verzögerung des Einsatzverlaufes, Patientenschädigung | Stress, fehlende Routine, fehlende Übung, Individualmedizin | 10        |
| Lageerkundung nicht vollständig durchgeführt | Falsche Lagebeurteilung, fehlerhafte Nachforderung    | Fehlende Routine, fehlende Übung                            | 8         |

| <b>Vorsichtung</b>                           |                                                                           |                                                                            |                  |
|----------------------------------------------|---------------------------------------------------------------------------|----------------------------------------------------------------------------|------------------|
| <b>1. Fehler</b>                             | <b>2. Fehlerauswirkung</b>                                                | <b>3. Fehlerursache</b>                                                    | <b>4. Risiko</b> |
| Zuweisung in zu hohe Sichtungskategorien     | Falsche Klinikzuweisung<br>Ressourcenbindung, Zeitverzug                  | Nicht an Sichtungsalgorithmus orientiert                                   | 8                |
| Zuweisung in zu geringe Sichtungskategorie   | Geringe Nachalarmierung, fehlende Klinikvorbereitung, Patientenschädigung | Nicht an Sichtungsalgorithmus orientiert                                   | 9                |
| Vorsichtung zu detailliert                   | Zeitverzögerung                                                           | Nicht an Sichtungsalgorithmus orientiert                                   | 6                |
| <b>Führungsstruktur</b>                      |                                                                           |                                                                            |                  |
| <b>1. Fehler</b>                             | <b>2. Fehlerauswirkung</b>                                                | <b>3. Fehlerursache</b>                                                    | <b>4. Risiko</b> |
| Kein Aufbau einer Führungsstruktur           | Chaos, Individualmedizin, Spontantransporte, Fehler bei der Nachforderung | Unerfahrene Kräfte, fehlendes Know-how                                     | 9                |
| Falsche Entscheidungen                       | Chaos, Individualmedizin                                                  | Stress, mangelnde Ausbildung                                               | 7                |
| <b>Nachforderung</b>                         |                                                                           |                                                                            |                  |
| <b>1. Fehler</b>                             | <b>2. Fehlerauswirkung</b>                                                | <b>3. Fehlerursache</b>                                                    | <b>4. Risiko</b> |
| Zu wenig Kräfte nachgefordert                | Verzögerung, Ressourcenmangel, keine Betreuung                            | Fehlerhafte Lageeinschätzung und -beurteilung, Unwissenheit                | 8                |
| Zu viel Kräfte nachgefordert                 | Volle Bereitstellungsräume, Verstopfung der Einsatzstelle                 | Stress, Überforderung, fehlerhafte Lageerkundung, und -beurteilung         | 5                |
| Spezialeinheiten nicht angefordert           | Eigengefährdung                                                           | Unkenntnis über Vorhandensein an Ressourcen                                | 7                |
| <b>Transportorganisation</b>                 |                                                                           |                                                                            |                  |
| <b>1. Fehler</b>                             | <b>2. Fehlerauswirkung</b>                                                | <b>3. Fehlerursache</b>                                                    | <b>4. Risiko</b> |
| Transport nicht entsprechen<br>Priorisierung | Falsche Klinikeinteilung, Patientenschädigung                             | Abweichung von Sichtungskategorie durch Personal der Transportorganisation | 7                |
| Fehlen einer Transportorganisation           | Fehlbelegung in Kliniken, individualmedizinische Versorgung               | Fehlen einer Führungsstruktur                                              | 9                |

|                                    |                                               |                   |   |
|------------------------------------|-----------------------------------------------|-------------------|---|
| Abweichung von Zuweisungskonzepten | Fehlbelegung, Zeitverzug, Patientenschädigung | Fehlende Kenntnis | 7 |
|------------------------------------|-----------------------------------------------|-------------------|---|

## Experte 5

| Lagebeurteilung                         |                                                                     |                                                                                  |           |
|-----------------------------------------|---------------------------------------------------------------------|----------------------------------------------------------------------------------|-----------|
| 1. Fehler                               | 2. Fehlerauswirkung                                                 | 3. Fehlerursache                                                                 | 4. Risiko |
| Unterschätzung der Lage                 | Unterdeckung an Rettungskräften, Verzögerung, Patientenschädigung   | –                                                                                | 8         |
| Überschätzung der Lage                  | Unterdeckung bei anderen Einsätzen                                  | –                                                                                | 6         |
| Keine umfassende Lagebeurteilung        | Übersehen von Patienten                                             | Konzentration auf einen Gefährdungspunkt, sofortige Rettungsmaßnahmen, Witterung | 8         |
| Vorsichtung                             |                                                                     |                                                                                  |           |
| 1. Fehler                               | 2. Fehlerauswirkung                                                 | 3. Fehlerursache                                                                 | 4. Risiko |
| Zuweisung in zu hohe Sichtungskategorie | Abweichen von Sichtungsalgorithmus, höhere Ressourcenbindung        | Durchführung von Person mit zu hoher medizinischer Qualifikation                 | 6         |
| Raumordnung                             |                                                                     |                                                                                  |           |
| 1. Fehler                               | 2. Fehlerauswirkung                                                 | 3. Fehlerursache                                                                 | 4. Risiko |
| Unstrukturierte Raumordnung             | Behinderung von Patiententransport, Behinderung der Zu- und Abfahrt | Keine MANV Erwähnung in Alarmierung                                              | 5         |
| Führungsstruktur                        |                                                                     |                                                                                  |           |
| 1. Fehler                               | 2. Fehlerauswirkung                                                 | 3. Fehlerursache                                                                 | 4. Risiko |
| fehlender Aufbau einer Führungsstruktur | Chaos, Verzögerung                                                  | Individualmedizin, fehlende Übung, mangelhafte Ausbildung                        | 8         |
| Keine Einsatzabschnittsbildung          | Überlastung der Führungsebene                                       | Tunnelblick                                                                      | 4         |
| Informationsverluste bei Übergabe       | Einsatzabschnitte geraten aus dem Fokus                             | Überforderung der ersten Führungskraft, Dokumentationsprobleme                   | 6         |
| Transportorganisation                   |                                                                     |                                                                                  |           |
| 1. Fehler                               | 2. Fehlerauswirkung                                                 | 3. Fehlerursache                                                                 | 4. Risiko |

|                                            |                                                                  |                                   |   |
|--------------------------------------------|------------------------------------------------------------------|-----------------------------------|---|
| Keine Informationen von Kliniken eingeholt | Überlastung einzelner Kliniken, Verzögerung, Patientenschädigung | Kliniken melden Kapazitäten nicht | 7 |
|--------------------------------------------|------------------------------------------------------------------|-----------------------------------|---|
