# Supplementary material for: Lernen und üben wir das Richtige?
Source: Springer Nature journal article supplement (doi:10.1007/s10049-020-00824-2), 2021-01-12
Supplement: MOESM2 [file 18761762]

## Zusatzmaterial zum Beitrag

Drews P., Berger M., Sautter J. und Rohde A.: Lernen und Üben wir das Richtige? Kritische Erfolgsfaktoren der Bewältigung des Massenfalls von Verletzten: Ergebnisse einer FMEA und einer Analyse von MANV-bezogenen Curricula. (2020) publiziert in *Notfall und Rettungsmedizin*.

Beitrag und Zusatzmaterial stehen Ihnen auf [www.springermedizin.de](http://www.springermedizin.de) zur Verfügung. Bitte geben Sie dort den Beitragstitel in die Suche ein.

| Lageerkundung                                |                                                                     |                                                             |           |
|----------------------------------------------|---------------------------------------------------------------------|-------------------------------------------------------------|-----------|
| 1. Fehler                                    | 2. Fehlerauswirkung                                                 | 3. Fehlerursache                                            | 4. Risiko |
| Keine umfassende Erkundung                   | Nicht ausreichende Nachalarmierung, zeitliche Verzögerung           | Fehlende Ausbildung, fehlende Übung,                        | 8         |
| Keine umfassende Erkundung                   | Fehlerhafte Nachalarmierung, zeitliche Verzögerung Versorgungslücke | Unstrukturiertes Vorgehen, fehlende Konditionierung         | 6         |
| Keine Lageerkundung durchgeführt             | Verzögerung des Einsatzverlaufes, Patientenschädigung               | Stress, fehlende Routine, fehlende Übung, Individualmedizin | 10        |
| Lageerkundung nicht vollständig durchgeführt | Falsche Lagebeurteilung, fehlerhafte Nachforderung                  | Fehlende Routine, fehlende Übung                            | 8         |

| Lagebeurteilung                  |                                                 |                                                                                  |           |
|----------------------------------|-------------------------------------------------|----------------------------------------------------------------------------------|-----------|
| 1. Fehler                        | 2. Fehlerauswirkung                             | 3. Fehlerursache                                                                 | 4. Risiko |
| Unpräzise Lagebeurteilung        | Zu geringe Nachforderung, zeitliche Verzögerung | Vermeidungstaktik                                                                | 8         |
| Missdeutung der Lage             | Eigengefährdung                                 | Unstrukturiertes Vorgehen, fehlende Konditionierung                              | 8         |
| Überschätzung der Lage           | Unterdeckung bei anderen Einsätzen              | -                                                                                | 6         |
| Keine umfassende Lagebeurteilung | Übersehen von Patienten                         | Konzentration auf einen Gefährdungspunkt, sofortige Rettungsmaßnahmen, Witterung | 8         |

## Nachforderung

| 1. Fehler                          | 2. Fehlerauswirkung                                       | 3. Fehlerursache                                                   | 4. Risiko |
|------------------------------------|-----------------------------------------------------------|--------------------------------------------------------------------|-----------|
| Zu geringe Nachforderung           | Zeitliche Verzögerung                                     | Vermeidungstaktik, fehlende Erfahrung                              | -         |
| Zögernde Nachforderung             | Zeitliche Verzögerung                                     | Vermeidungstaktik, fehlende Erfahrung                              | -         |
| Zu wenig Kräfte nachgefordert      | Verzögerung, Ressourcenmangel, keine Betreuung            | Fehlerhafte Lageeinschätzung und -beurteilung, Unwissenheit        | 8         |
| Zu viel Kräfte nachgefordert       | Volle Bereitstellungsräume, Verstopfung der Einsatzstelle | Stress, Überforderung, fehlerhafte Lageerkundung, und -beurteilung | 5         |
| Spezialeinheiten nicht angefordert | Eigengefährdung                                           | Unkenntnis über Vorhandensein an Ressourcen                        | 7         |

## Vorsichtung

| 1. Fehler                                  | 2. Fehlerauswirkung                                                       | 3. Fehlerursache                                                 | 4. Risiko |
|--------------------------------------------|---------------------------------------------------------------------------|------------------------------------------------------------------|-----------|
| Abweichen vom Algorithmus                  | Zeitverzug, falsche Entscheidungen                                        | Mangelndes Verständnis, Abweichen von Regeln, mangelnde Übung    | 8         |
| Individualmedizin                          | Zeitverzögertes Finden von Patienten mit SK1 und Transportpriorität       | Psychologische Aspekte, mangelnde Übung                          | 10        |
| Zuweisung in zu hohe Sichtungskategorien   | Falsche Klinikzuweisung Ressourcenbindung, Zeitverzug                     | Nicht an Sichtungsalgorithmus orientiert                         | 8         |
| Zuweisung in zu geringe Sichtungskategorie | Geringe Nachalarmierung, fehlende Klinikvorbereitung, Patientenschädigung | Nicht an Sichtungsalgorithmus orientiert                         | 9         |
| Vorsichtung zu detailliert                 | Zeitverzögerung                                                           | Nicht an Sichtungsalgorithmus orientiert                         | 6         |
| Zuweisung in zu hohe Sichtungskategorie    | Abweichen von Sichtungsalgorithmus, höhere Ressourcenbindung              | Durchführung von Person mit zu hoher medizinischer Qualifikation | 6         |

## Transportorganisation

| 1. Fehler                                    | 2. Fehlerauswirkung                                               | 3. Fehlerursache                                                           | 4. Risiko |
|----------------------------------------------|-------------------------------------------------------------------|----------------------------------------------------------------------------|-----------|
| Fehlende Einrichtung                         | Fehlender Überblick, falsche Klinikzuweisung, Patientenschädigung | keinen Verantwortlichen benannt, Überlastung der Führungsebene             | 10        |
| Fehlen einer Transportorganisation           | Fehlbelegung in Kliniken, individualmedizinische Versorgung       | Fehlen einer Führungsstruktur                                              | 9         |
| Schlechte logistische Lagerung der Patienten | Zeitlicher Verzug                                                 | Schlechte Raumordnung                                                      | 4         |
| Transport nicht entsprechen Priorisierung    | Falsche Klinikeinteilung, Patientenschädigung                     | Abweichung von Sichtungskategorie durch Personal der Transportorganisation | 7         |
| Abweichung von Zuweisungskonzepten           | Fehlbelegung, Zeitverzug, Patientenschädigung                     | Fehlende Kenntnis                                                          | 7         |
| Keine Informationen von Kliniken eingeholt   | Überlastung einzelner Kliniken, Verzögerung, Patientenschädigung  | Kliniken melden Kapazitäten nicht                                          | 7         |

## Raumordnung

| 1. Fehler                     | 2. Fehlerauswirkung                                                       | 3. Fehlerursache                    | 4. Risiko |
|-------------------------------|---------------------------------------------------------------------------|-------------------------------------|-----------|
| Kein Aufbau einer Raumordnung | längere Transportwege, Ressourcenbindung, Verlängerung der Prozessabläufe | Nicht Erkennen der MANV-Lage        | 7         |
| Unstrukturierte Raumordnung   | Behinderung von Patiententransport, Behinderung der Zu- und Abfahrt       | Keine MANV Erwähnung in Alarmierung | 5         |

## Sichtung

| 1. Fehler                          | 2. Fehlerauswirkung   | 3. Fehlerursache   | 4. Risiko |
|------------------------------------|-----------------------|--------------------|-----------|
| Abweichen vom Sichtungsalgorithmus | Zeitliche Verzögerung | Zu wenig Erfahrung | 7         |

## Führungsstruktur

| 1. Fehler                                     | 2. Fehlerauswirkung                                                                   | 3. Fehlerursache                                                    | 4. Risiko |
|-----------------------------------------------|---------------------------------------------------------------------------------------|---------------------------------------------------------------------|-----------|
| Parallelstrukturen                            | Führungschaos,<br>Ressourcenverschwendung                                             | Rechtliche<br>Unklarheiten, fehlende<br>Abstimmung                  | 8         |
| Kein Aufbau einer<br>Führungsstruktur         | Chaos,<br>Individualmedizin,<br>Spontantransporte,<br>Fehler bei der<br>Nachforderung | Unerfahrene Kräfte,<br>fehlendes Know-how                           | 9         |
| fehlender Aufbau<br>einer<br>Führungsstruktur | Chaos,<br>Verzögerung                                                                 | Individualmedizin,<br>fehlende Übung,<br>mangelhafte<br>Ausbildung  | 8         |
| Keine<br>Einsatzabschnittsbildung             | Überlastung der<br>Führungsebene                                                      | Tunnelblick                                                         | 4         |
| Informationsverluste<br>bei Übergabe          | Einsatzabschnitte<br>geraten aus dem<br>Fokus                                         | Überforderung der<br>ersten Führungskraft,<br>Dokumentationsproblem | 6         |
